# Supplementary material
Source: MDPI journal article supplement (https://www.mdpi.com/2077-0472/5/3/649)
Supplement: s1 [file s1]

Supplementary


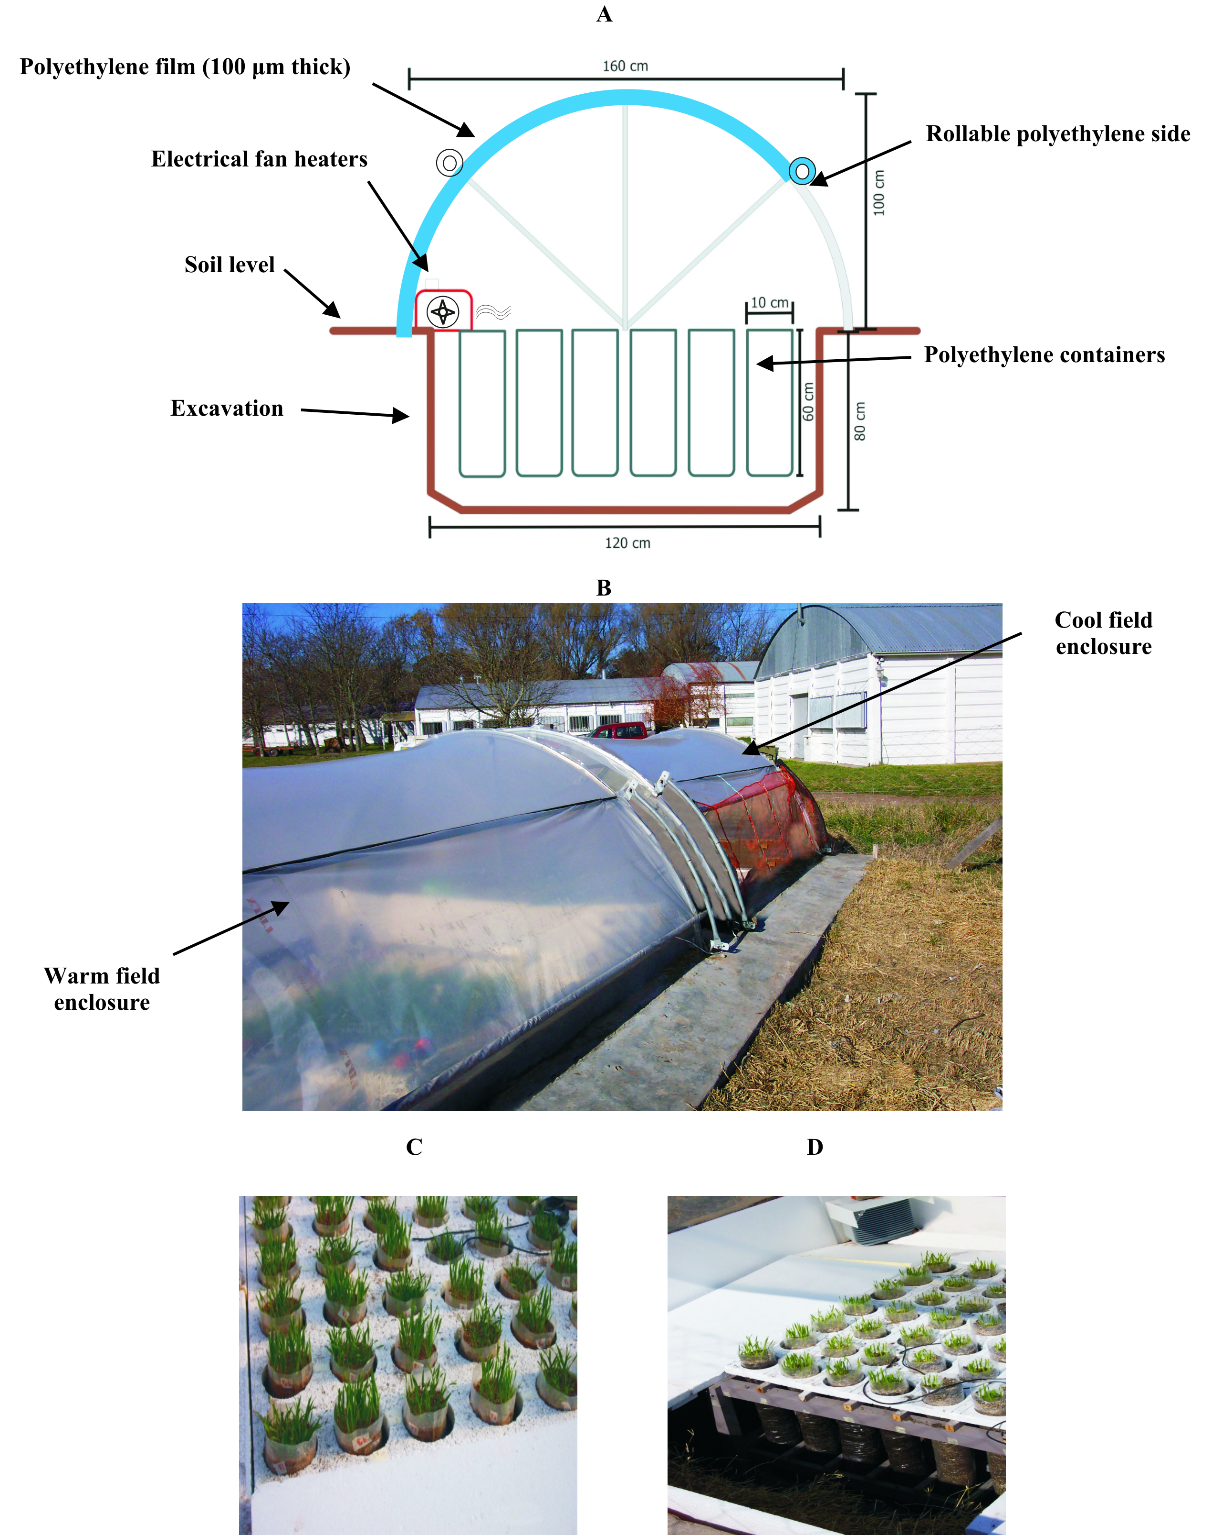


**Figure S1.** Field enclosure devices used for 2005, 2006 and 2008 experiments.
(**A**) Diagrammatic scheme (cross section) of an enclosure, showing dimensions.
(**B**) Picture of both (Cool and Warm) field enclosures. (**C**) A detail of the container arrangement within a grid, with expanded polystyrene board used to insulate the root environment. (**D**) Idem C with a board removed to show containers disposition below soil level. A heater/fan at the corner and black thermocouples wires among containers can be seen.


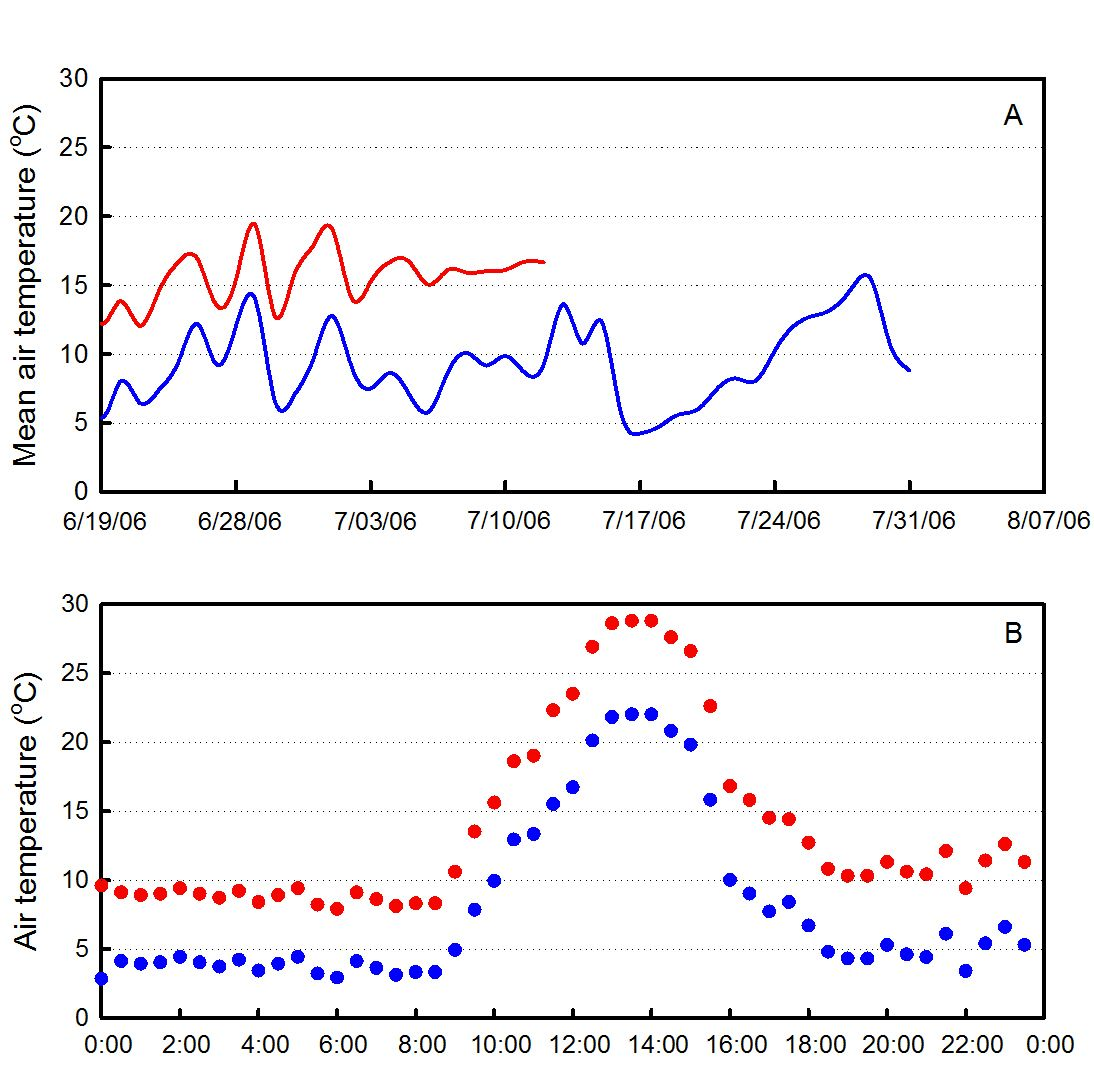


**Figure S2.** (**A**) Daily mean air temperatures (°C) during 2006 field enclosure experiment. Plants in the Warm treatment (red line) attained 3rd leaf stage 19 days earlier than those in the Cool one (blue line). (**B**) Air temperature (°C) dynamics for a typical day (22nd June) in the same experiment. Blue and red dots identify Cool and Warm treatments, respectively.

**Table S1.** Time in days and °Cd (Base temperature = 0 °C) from sowing to the 3rd fully expanded leaf stage of wheat cv Pincén and cv Patacón grown in Cool or Warm field enclosures in 2005, 2006 and 2008 experiments and in growth chambers at either 5 °C or 25 °C. For transferred plants (Cool-Warm or 5 °C–25 °C) values correspond to the time elapsed from sowing to the 4th fully expanded leaf stage. Mean air temperatures for cool and warm field enclosures varied between 8.1 °C–9.3 °C and between 15.7 °C–16.5 °C, respectively.

|  | **Days** | | | | | | **Thermal Time** | | | | | | |
| --- | --- | --- | --- | --- | --- | --- | --- | --- | --- | --- | --- | --- | --- |
|  | **Cool** | | **Cool-Warm** | | **Warm** | | **Cool** | | **Cool-Warm** | | **Warm** | |
| **Field Enclosure** | **Pincén** | **Patacón** | **Pincén** | **Patacón** | **Pincén** | **Patacón** | **Pincén** | **Patacón** | **Pincén** | **Patacón** | **Pincén** | **Patacón** |
| 2005 | 29 | 33 | N.D. | N.D. | 20 | 20 | 247 | 281 | N.D. | N.D. | 330 | 330 |
| 2006 | 28 | 32 | N.D. | N.D. | 20 | 21 | 261 | 298 | N.D. | N.D. | 313 | 323 |
| 2008 | 29 | 30 | 36 | 38 | 19 | 21 | 252 | 264 | 366 | 395 | 312 | 347 |
| Growth Chamber | 5 °C | | 5 °C–25 °C | | 25 °C | | 5 °C | | 5 °C–25 °C | | 25 °C | |
| Experiment 1 | 53 | 55 | N.D. | N.D. | 13 | 13 | 266 | 278 | N.D. | N.D. | 321 | 321 |
| Experiment 2 | 53 | 55 | 58 | 60 | 13 | 13 | 266 | 278 | 391 | 403 | 321 | 321 |

N.D.: Not determined.
